# Supplementary material for: Sequence-based in silico analysis of well studied Hepatitis C Virus epitopes and their variants in other genotypes (particularly genotype 5a) against South African human leukocyte antigen backgrounds
Source: PubMed Central journal article supplement (PMC3552980; doi:10.1186/1471-2172-13-67), 2012-12-10
Supplement: 1471-2172-13-67-S1.pdf [file 1471-2172-13-67-S1.pdf]

| Subtype/Genotype | HCV Consensus:<br><b>LTSLGLNAV</b>                                                 | % Conservation |
|------------------|------------------------------------------------------------------------------------|----------------|
| 1a<br>1b         |  | 67             |
| g2               | ALRGMGYNAV                                                                         | 56             |
| g3               | KLRGMGLNAV                                                                         | 67             |
| g4               | QLTSLGLNAV                                                                         | 78             |
| 5a               | QLTSLGLNAV                                                                         | 67             |
| g6               | KLRGMGLNAV                                                                         | 56             |
