# Supplementary material for: Sequence-based in silico analysis of well studied Hepatitis C Virus epitopes and their variants in other genotypes (particularly genotype 5a) against South African human leukocyte antigen backgrounds
Source: PubMed Central journal article supplement (PMC3552980; doi:10.1186/1471-2172-13-67), 2012-12-10
Supplement: 1471-2172-13-67-S6.pdf [file 1471-2172-13-67-S6.pdf]

# OptiTope

|                 |                   |             |         |
|-----------------|-------------------|-------------|---------|
| Target Antigens | Target Population | Constraints | Results |
|-----------------|-------------------|-------------|---------|

In this final step the optimization problem is summarized and the results are displayed. 

## Input summary

Number of candidate epitopes: 2930  
 Number of target alleles: 19  
 Number of antigens: 10  
 Prediction method: BIMAS

## Constraints

Maximum number of epitopes to select = 10  
 Epitope conservation  $\geq$  20.0 %  
 Covered alleles  $\geq$  10  
 Covered antigens  $\geq$  5

## Results

[Click here for more information](#)

Selected epitopes: 10  
 Covered alleles: 10 of 19  
 Covered antigens: 5 of 10  
 Locus coverage:

|    |         |
|----|---------|
| A  | 54.01 % |
| B  | 19.87 % |
| Cw | 35.11 % |

Population coverage: 94.28 %

| Epitope    | Fraction of overall immunogenicity | Covered alleles                          | Covered antigens |
|------------|------------------------------------|------------------------------------------|------------------|
| VLTDFKTWL  | 0.16                               | A*0201                                   | ns5a             |
| KLLPRLPGV  | 0.14                               | A*0201                                   | ns5a             |
| QLDLSGWFFV | 0.11                               | A*0201                                   | ns5b             |
| YLYGIGSAV  | 0.11                               | A*0201                                   | e2               |
| KLQDCTMLV  | 0.11                               | A*0201                                   | ns5b             |
| LLSTTEWQV  | 0.1                                | A*0201                                   | e2               |
| FLATCVNGV  | 0.1                                | A*0201                                   | ns3              |
| ALYDVVSTL  | 0.1                                | A*0201 A*0301                            | ns5b             |
| GPTPLLYRL  | 0.05                               | B*0702 B*3501 Cw*0401 Cw*0602<br>Cw*0702 | ns3              |
| GVVCAAILR  | 0.03                               | A*1101 A*3101 A*6801                     | ns4b             |

Show detailed results.

Export results.
