# Supplementary material for: Sequence-based in silico analysis of well studied Hepatitis C Virus epitopes and their variants in other genotypes (particularly genotype 5a) against South African human leukocyte antigen backgrounds
Source: PubMed Central journal article supplement (PMC3552980; doi:10.1186/1471-2172-13-67), 2012-12-10

### IEDB Population coverage

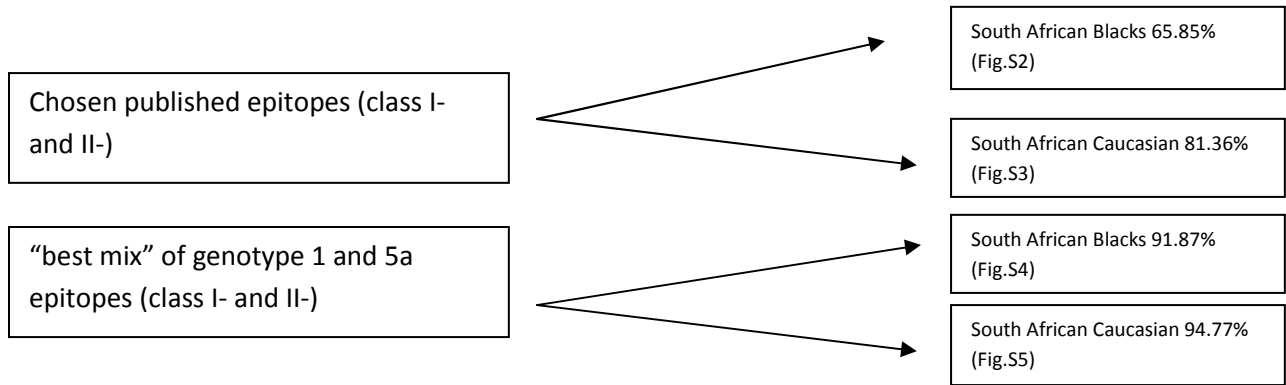

### OptiTope Population coverage

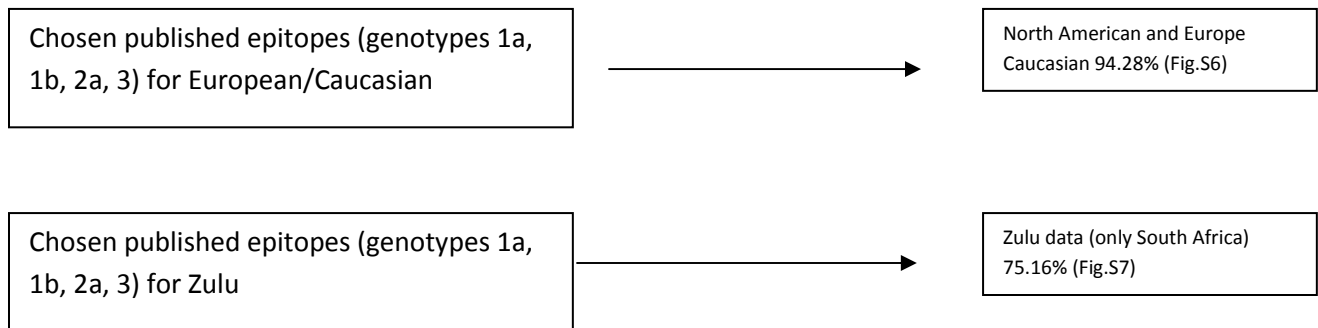

### OptiTope epitopes and placed in IEDB Population coverage tool

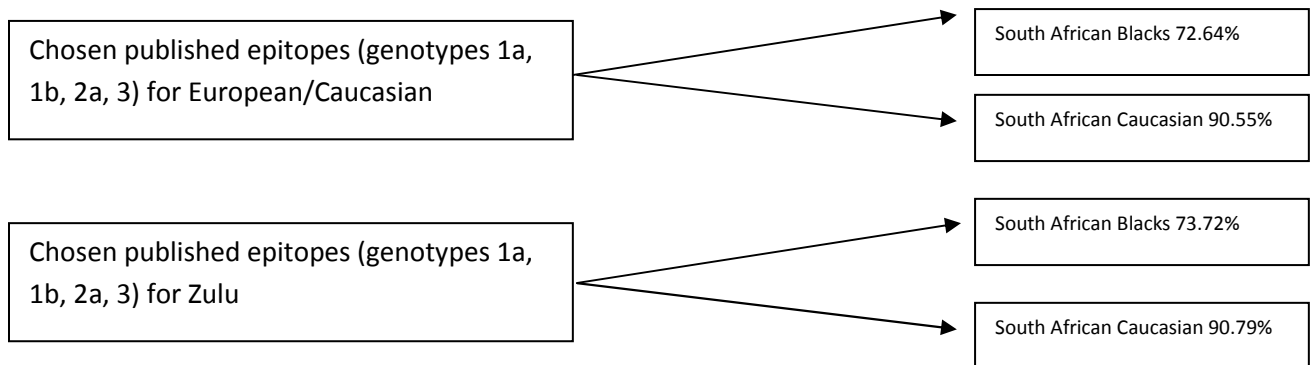

Supplement: 1471-2172-13-67-S8.pdf [file 1471-2172-13-67-S8.pdf]
